# Supplementary material for: Integrated Analysis of Agronomic Traits and Fruit Damage on Three Cucurbit Crops in the Ruzizi Plain, Eastern DR Congo: Climatic Influence, Soil Characteristics, Crop Development and Yield Dynamics
Source: Research Square preprint supplement (doi:10.21203/rs.3.rs-7359009/v1), 2025-08-26
Supplement: Supplementary file 1 [file cc9714e09c176b4a0eb89a90.docx]

**Table 1. Climatic condition (Till 5/01/2004 to 15/04/2024)**

| Year | Months | Days | Rainfall/Pmm(mm/day) | Relative Humidity/ RH(%) | | Monthly Temperature | | | Dew point |
| --- | --- | --- | --- | --- | --- | --- | --- | --- | --- |
|  |  |  |  | |  | MT  (°C) | MT  Max  (°C) | MT  Min  (°C) |
| 2024 | 1 | 5 | 103.80 | | 93.62 | 15.69 | 18.12 | 13.30 | 14.62 |
| 2024 | 1 | 6 | 12.10 | | 84.38 | 16.40 | 21.75 | 12.57 | 13.54 |
| 2024 | 1 | 7 | 43.30 | | 90.06 | 16.73 | 20.46 | 14.12 | 14.99 |
| 2024 | 1 | 8 | 54.07 | | 90.81 | 16.95 | 20.59 | 14.11 | 15.35 |
| 2024 | 1 | 9 | 22.08 | | 92.94 | 15.92 | 19.06 | 14.12 | 14.71 |
| 2024 | 1 | 10 | 17.57 | | 92.56 | 15.50 | 18.23 | 13.33 | 14.23 |
| 2024 | 1 | 11 | 8.70 | | 90.12 | 15.54 | 20.12 | 12.16 | 13.83 |
| 2024 | 1 | 12 | 11.90 | | 91.00 | 15.39 | 19.73 | 13.08 | 13.81 |
| 2024 | 1 | 13 | 10.98 | | 91.38 | 16.05 | 20.43 | 12.33 | 14.55 |
| 2024 | 1 | 14 | 9.44 | | 88.44 | 16.22 | 19.23 | 14.31 | 14.20 |
| 2024 | 1 | 15 | 28.13 | | 90.62 | 16.57 | 20.50 | 13.12 | 14.92 |
| 2024 | 1 | 16 | 25.47 | | 87.75 | 17.04 | 21.40 | 13.92 | 14.85 |
| 2024 | 1 | 17 | 46.65 | | 92.69 | 15.59 | 17.53 | 13.30 | 14.37 |
| 2024 | 1 | 18 | 5.25 | | 87.94 | 15.87 | 20.97 | 12.26 | 13.69 |
| 2024 | 1 | 19 | 14.20 | | 90.94 | 16.76 | 21.26 | 13.06 | 15.14 |
| 2024 | 1 | 20 | 12.88 | | 90.88 | 16.78 | 20.65 | 13.92 | 15.18 |
| 2024 | 1 | 21 | 4.60 | | 89.31 | 15.52 | 18.59 | 13.18 | 13.65 |
| 2024 | 1 | 22 | 12.77 | | 88.06 | 16.17 | 21.08 | 12.05 | 14.01 |
| 2024 | 1 | 23 | 67.68 | | 92.62 | 16.08 | 18.58 | 14.15 | 14.83 |
| 2024 | 1 | 24 | 30.26 | | 89.69 | 16.17 | 19.48 | 14.22 | 14.39 |
| 2024 | 1 | 25 | 10.73 | | 87.12 | 16.87 | 21.72 | 13.17 | 14.51 |
| 2024 | 1 | 26 | 31.64 | | 86.50 | 17.65 | 22.05 | 14.30 | 15.22 |
| 2024 | 1 | 27 | 15.59 | | 86,75 | 17.98 | 22.23 | 13,87 | 15.59 |
| 2024 | 1 | 28 | 27.36 | | 89.38 | 17.97 | 22.01 | 14.92 | 16.07 |
| 2024 | 1 | 29 | 17.33 | | 88.12 | 17.48 | 20.92 | 15.33 | 15.37 |
| 2024 | 1 | 30 | 30.58 | | 90.38 | 16.39 | 19.15 | 13.55 | 14.76 |
| 2024 | 1 | 31 | 30.45 | | 86.19 | 17.80 | 22.31 | 13.98 | 15.27 |
| 2024 | 2 | 1 | 85.10 | | 92.56 | 16.90 | 19.94 | 15.18 | 15.61 |
| 2024 | 2 | 2 | 8.92 | | 84.44 | 18.04 | 22.59 | 14.42 | 15.15 |
| 2024 | 2 | 3 | 22.35 | | 89.19 | 17.34 | 21.26 | 14.04 | 15.46 |
| 2024 | 2 | 4 | 21.34 | | 87.00 | 17.86 | 21.17 | 15.45 | 15.56 |
| 2024 | 2 | 5 | 13.89 | | 90.00 | 17.18 | 21.15 | 14.33 | 15.41 |
| 2024 | 2 | 6 | 17.81 | | 89.88 | 17.30 | 22.13 | 14.08 | 15.48 |
| 2024 | 2 | 7 | 6.36 | | 82.69 | 18.01 | 22.33 | 14.03 | 14.83 |
| 2024 | 2 | 8 | 3.07 | | 84.88 | 17.85 | 22.87 | 13.44 | 15.08 |
| 2024 | 2 | 9 | 5.82 | | 83.12 | 18.55 | 23.65 | 13.55 | 15.38 |
| 2024 | 2 | 10 | 68.89 | | 87.5 | 17.86 | 22.01 | 14.77 | 15.60 |
| 2024 | 2 | 11 | 14.03 | | 86.94 | 18.26 | 22.46 | 14.98 | 15.87 |
| 2024 | 2 | 12 | 5.66 | | 81.75 | 18.75 | 22.91 | 15.29 | 15.33 |
| 2024 | 2 | 13 | 23.51 | | 87.19 | 18.1 | 22.4 | 14.05 | 15.79 |
| 2024 | 2 | 14 | 112.83 | | 93.25 | 16.73 | 19.33 | 14.06 | 15.6 |
| 2024 | 2 | 15 | 11.08 | | 87.06 | 16.57 | 20.64 | 13.15 | 14.33 |
| 2024 | 2 | 16 | 14.70 | | 84.81 | 18.05 | 21.70 | 15.26 | 15.36 |
| 2024 | 2 | 17 | 22.63 | | 88.50 | 18.00 | 22.02 | 14.51 | 15.94 |
| 2024 | 2 | 18 | 122.31 | | 89.25 | 17.87 | 21.82 | 15.59 | 15.95 |
| 2024 | 2 | 19 | 6.55 | | 85.88 | 18.12 | 22.80 | 14.32 | 15.46 |
| 2024 | 2 | 20 | 11.26 | | 87.62 | 18.37 | 22.93 | 15.01 | 16.12 |
| 2024 | 2 | 21 | 20.78 | | 88.38 | 18.79 | 23.03 | 15.20 | 16.68 |
| 2024 | 2 | 22 | 17.66 | | 85.44 | 18.92 | 23.05 | 15.69 | 16.25 |
| 2024 | 2 | 23 | 25.78 | | 87.69 | 17.65 | 20.19 | 15.16 | 15.52 |
| 2024 | 2 | 24 | 20.28 | | 87.81 | 18.68 | 23.00 | 15.31 | 16.48 |
| 2024 | 2 | 25 | 7.82 | | 85.56 | 17.64 | 21.62 | 13.53 | 15.08 |
| 2024 | 2 | 26 | 41.02 | | 93.12 | 16.01 | 18.18 | 13.94 | 14.85 |
| 2024 | 2 | 27 | 5.37 | | 85.25 | 17.12 | 22.53 | 13.68 | 14.43 |
| 2024 | 2 | 28 | 22.65 | | 81.31 | 16.52 | 20.90 | 12.93 | 13.12 |
| 2024 | 2 | 29 | 29.61 | | 85.44 | 17.22 | 22.03 | 12.76 | 14.54 |
| 2024 | 3 | 1 | 27.13 | | 86.81 | 17.20 | 22.55 | 13.87 | 14.81 |
| 2024 | 3 | 2 | 20.99 | | 87.69 | 17.26 | 21.28 | 14.08 | 15.05 |
| 2024 | 3 | 3 | 14.55 | | 88.69 | 18.05 | 22.58 | 15.08 | 15.97 |
| 2024 | 3 | 4 | 75.89 | | 92.19 | 16.58 | 18.73 | 14.34 | 15.26 |
| 2024 | 3 | 5 | 28.25 | | 85.75 | 17.60 | 21.93 | 14.19 | 15.02 |
| 2024 | 3 | 6 | 19.87 | | 89.75 | 17.72 | 20.97 | 15.63 | 15.92 |
| 2024 | 3 | 7 | 13.70 | | 88.25 | 17.98 | 22.08 | 14.51 | 15.85 |
| 2024 | 3 | 8 | 22.76 | | 88.69 | 18.19 | 22.74 | 14.44 | 16.15 |
| 2024 | 3 | 9 | 42.88 | | 86.75 | 18.51 | 23.16 | 15.35 | 16.10 |
| 2024 | 3 | 10 | 65.00 | | 88.31 | 17.65 | 22.22 | 14.55 | 15.55 |
| 2024 | 3 | 11 | 12.14 | | 84.69 | 17.84 | 22.72 | 12.65 | 15.08 |
| 2024 | 3 | 12 | 15.11 | | 83.19 | 18.64 | 23.37 | 14.85 | 15.44 |
| 2024 | 3 | 13 | 3.87 | | 84.88 | 18.44 | 24.07 | 14.28 | 15.58 |
| 2024 | 3 | 14 | 15.72 | | 88.94 | 18.14 | 22.76 | 13.74 | 16.13 |
| 2024 | 3 | 15 | 11.10 | | 87.62 | 18.01 | 22.68 | 14.44 | 15.74 |
| 2024 | 3 | 16 | 16.72 | | 87.19 | 18.06 | 23.17 | 13.13 | 15.70 |
| 2024 | 3 | 17 | 11.82 | | 85.31 | 18.48 | 23.10 | 14.72 | 15.76 |
| 2024 | 3 | 18 | 6.30 | | 84.75 | 18.46 | 23.63 | 13.92 | 15.58 |
| 2024 | 3 | 19 | 17.80 | | 87.94 | 18.54 | 23.02 | 15.01 | 16.33 |
| 2024 | 3 | 20 | 31.39 | | 88.62 | 18.80 | 23.19 | 15.45 | 16.72 |
| 2024 | 3 | 21 | 50.94 | | 92.12 | 18.60 | 21.98 | 16.40 | 17.22 |
| 2024 | 3 | 22 | 17.12 | | 89.38 | 17.90 | 22.52 | 15.02 | 15.98 |
| 2024 | 3 | 23 | 8.03 | | 92.06 | 16.38 | 19.96 | 13.65 | 15.02 |
| 2024 | 3 | 24 | 6.34 | | 87.12 | 16.83 | 20.94 | 12.09 | 14.53 |
| 2024 | 3 | 25 | 8.97 | | 87.50 | 18.11 | 22.58 | 14.71 | 15.84 |
| 2024 | 3 | 26 | 31.27 | | 89.00 | 18.15 | 22.23 | 14.37 | 16.19 |
| 2024 | 3 | 27 | 36.97 | | 86.50 | 18.35 | 22.55 | 15.40 | 15.92 |
| 2024 | 3 | 28 | 121.07 | | 88.06 | 17.88 | 22.75 | 13.73 | 15.70 |
| 2024 | 3 | 29 | 25.00 | | 86.81 | 17.10 | 22.30 | 12.53 | 14.76 |
| 2024 | 3 | 30 | 21.86 | | 91.69 | 17.73 | 21.09 | 15.07 | 16.27 |
| 2024 | 3 | 31 | 144.36 | | 94.00 | 16.60 | 19.79 | 13.05 | 15.59 |
| 2024 | 4 | 1 | 9.10 | | 85.75 | 16.70 | 20.99 | 13.19 | 14.16 |
| 2024 | 4 | 2 | 34.36 | | 92.56 | 16.42 | 19.58 | 14.40 | 15.15 |
| 2024 | 4 | 3 | 17.18 | | 89.62 | 16.44 | 20.61 | 12.83 | 14.62 |
| 2024 | 4 | 4 | 28.47 | | 92.31 | 17.15 | 20.97 | 14.19 | 15.83 |
| 2024 | 4 | 5 | 22.81 | | 88.12 | 17.44 | 20.98 | 13.92 | 15.34 |
| 2024 | 4 | 6 | 100.78 | | 92.06 | 17.84 | 21.84 | 14.74 | 16.46 |
| 2024 | 4 | 7 | 101.9 | | 94.44 | 16.65 | 19.39 | 13.40 | 15.72 |
| 2024 | 4 | 8 | 29.79 | | 91.56 | 15.56 | 20.08 | 12.42 | 14.10 |
| 2024 | 4 | 9 | 8.44 | | 88.44 | 16.36 | 19.73 | 13.63 | 14.33 |
| 2024 | 4 | 10 | 23.31 | | 90.19 | 16.95 | 20.05 | 14.50 | 15.26 |
| 2024 | 4 | 11 | 8.77 | | 85.06 | 18.17 | 23.30 | 13.40 | 15.40 |
| 2024 | 4 | 12 | 17.26 | | 88.88 | 18.19 | 22.68 | 14.39 | 16.18 |
| 2024 | 4 | 13 | 47.21 | | 94.19 | 16.75 | 18.81 | 14.74 | 15.78 |
| 2024 | 4 | 14 | 74.02 | | 93.75 | 16.26 | 19.94 | 13.33 | 15.21 |
| 2024 | 4 | 15 | 39.07 | | 92.44 | 17.74 | 21.19 | 15.51 | 16.43 |

<https://power.larc.nasa.gov(2024)>.


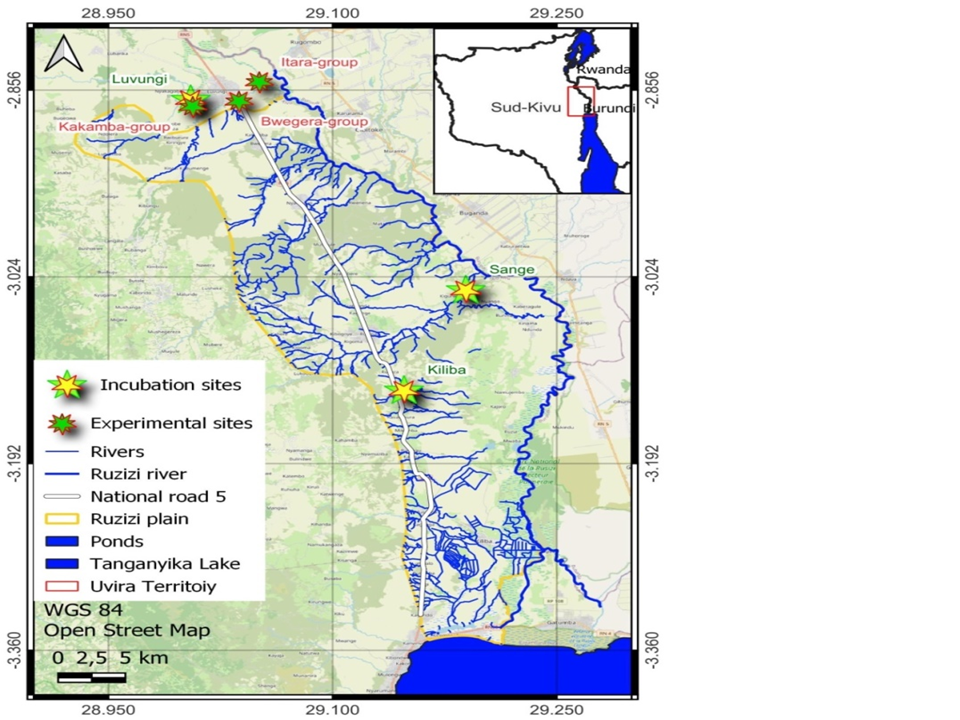


**Fig.13 Map of study area: Experimental sites in green**
